# Supplementary material
Source: PubMed Central journal article supplement (PMC2410077)

**A**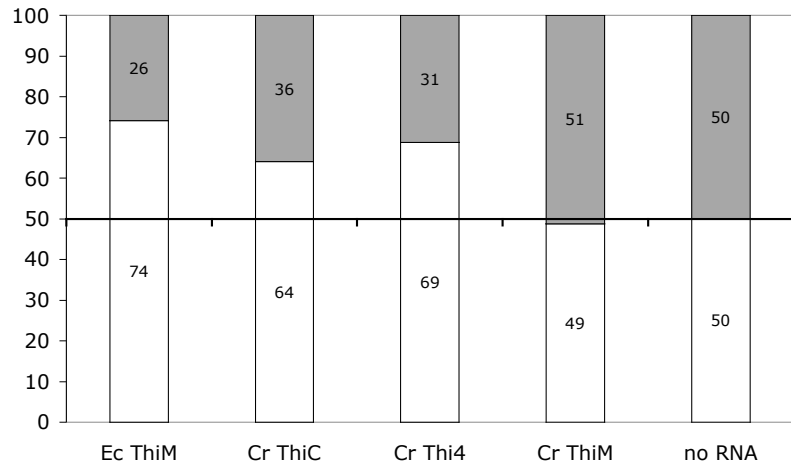**B**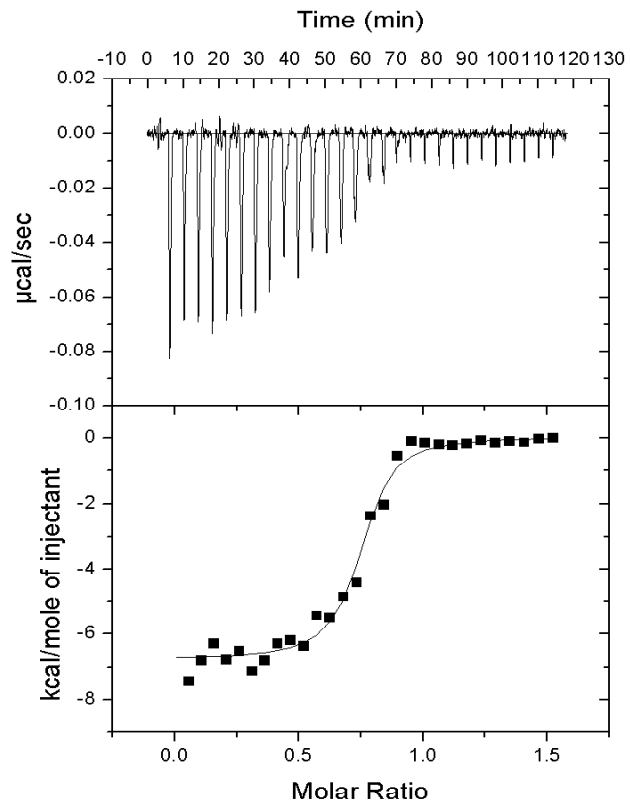

Supplement: pnas_0705786105_3.pdf [file pnas_0705786105_3.pdf]

**A**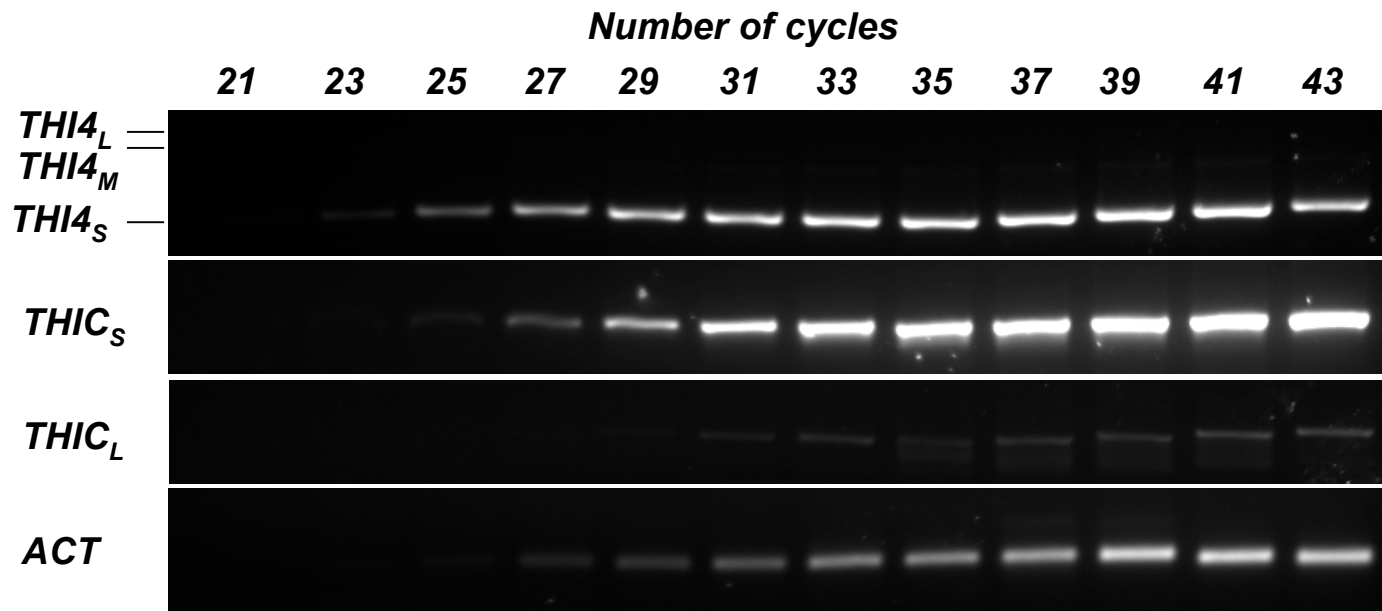**B**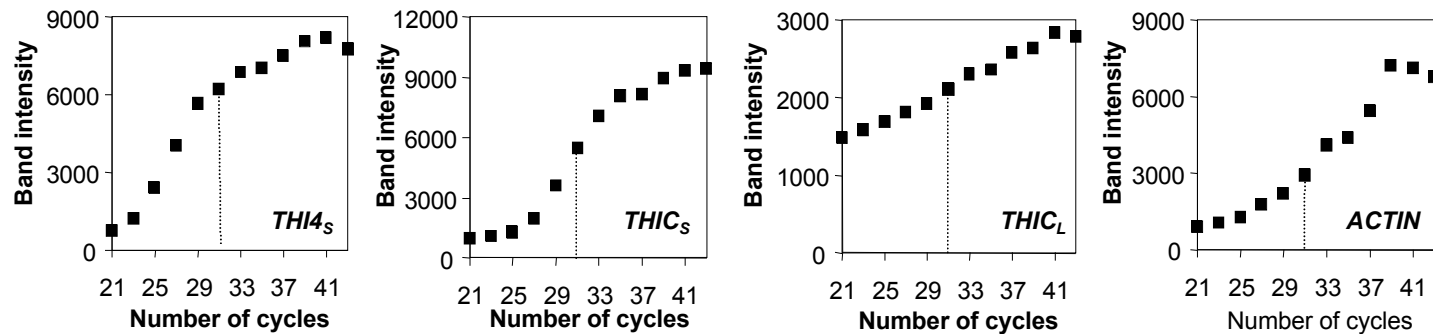

Supplement: pnas_0705786105_7.pdf [file pnas_0705786105_7.pdf]

**A**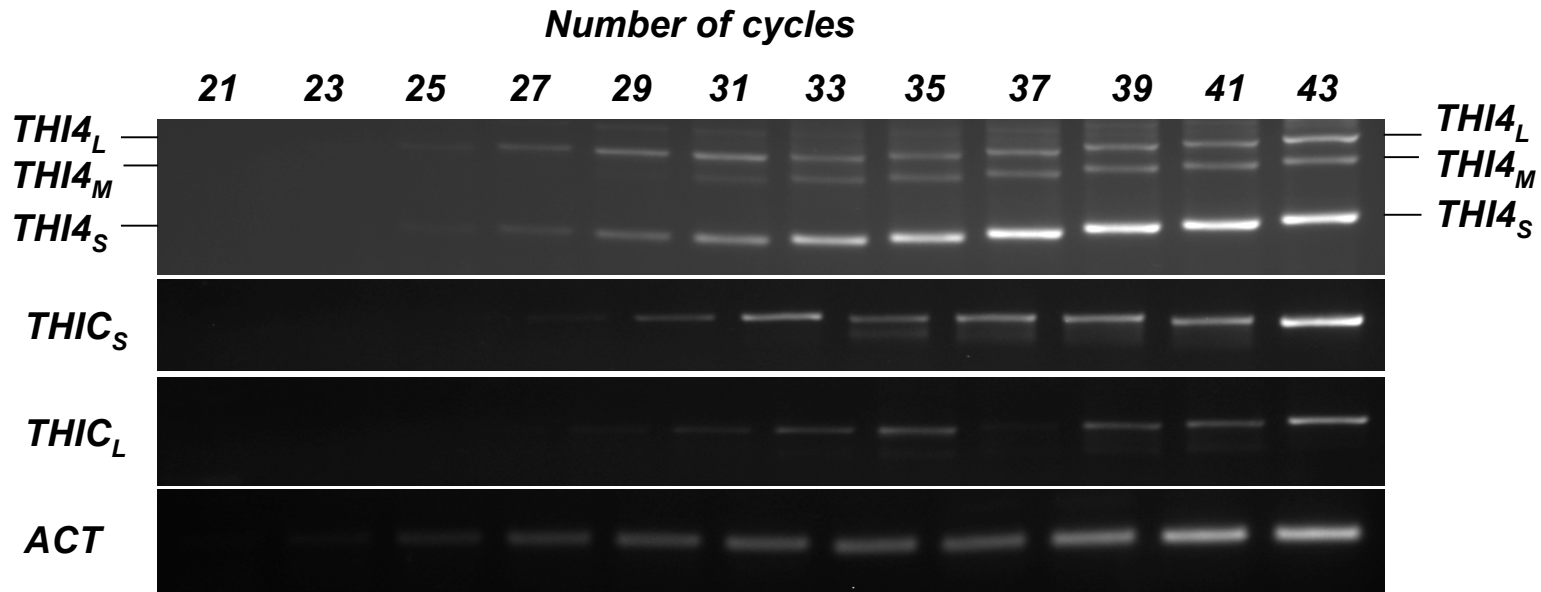**B**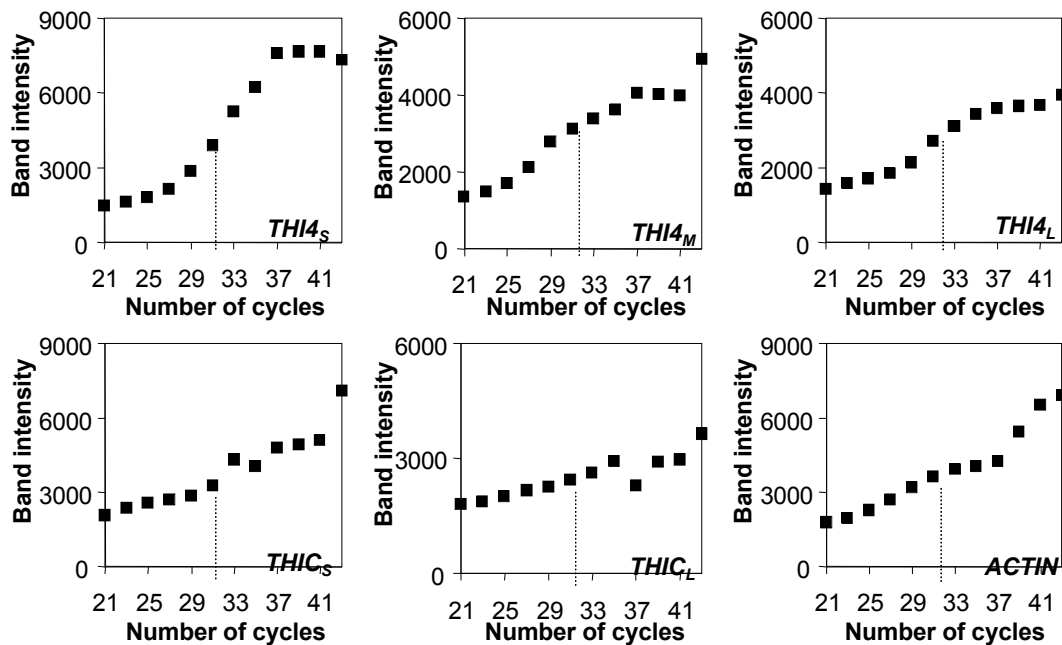

Supplement: pnas_0705786105_8.pdf [file pnas_0705786105_8.pdf]
